# Supplementary material for: LncRNA SNHG3 Promotes Proliferation and Metastasis of Non-Small-Cell Lung Cancer Cells Through miR-515-5p/SUMO2 Axis
Source: PubMed Central journal article supplement — Technol Cancer Res Treat. 2021 May 25;20:15330338211019376. doi: 10.1177/15330338211019376 (PMC8155750; doi:10.1177/15330338211019376), 2021-05-25
Supplement: sj-pdf-1-tct-10.1177_15330338211019376.pdf [file sj-pdf-1-tct-10.1177_15330338211019376.pdf]

**Fig2H**

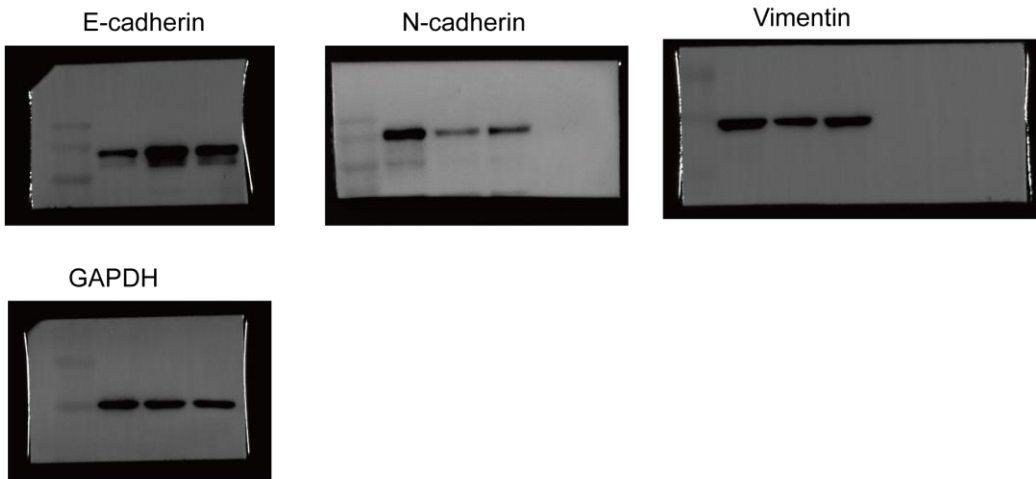

**Fig6G**

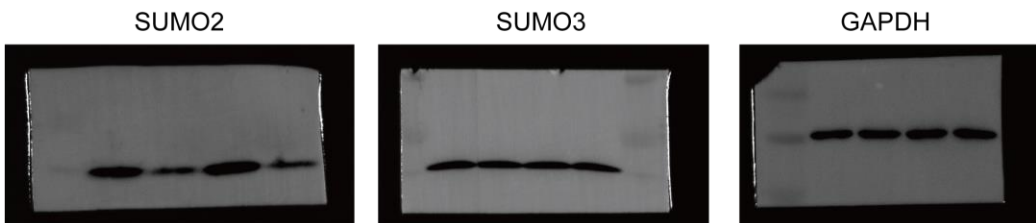

**Fig7D**

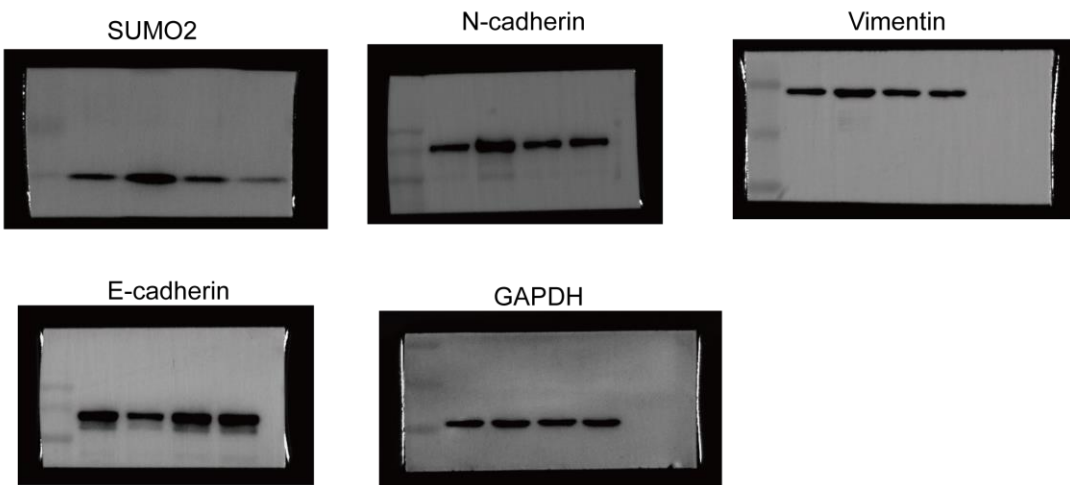

---

Fig3B

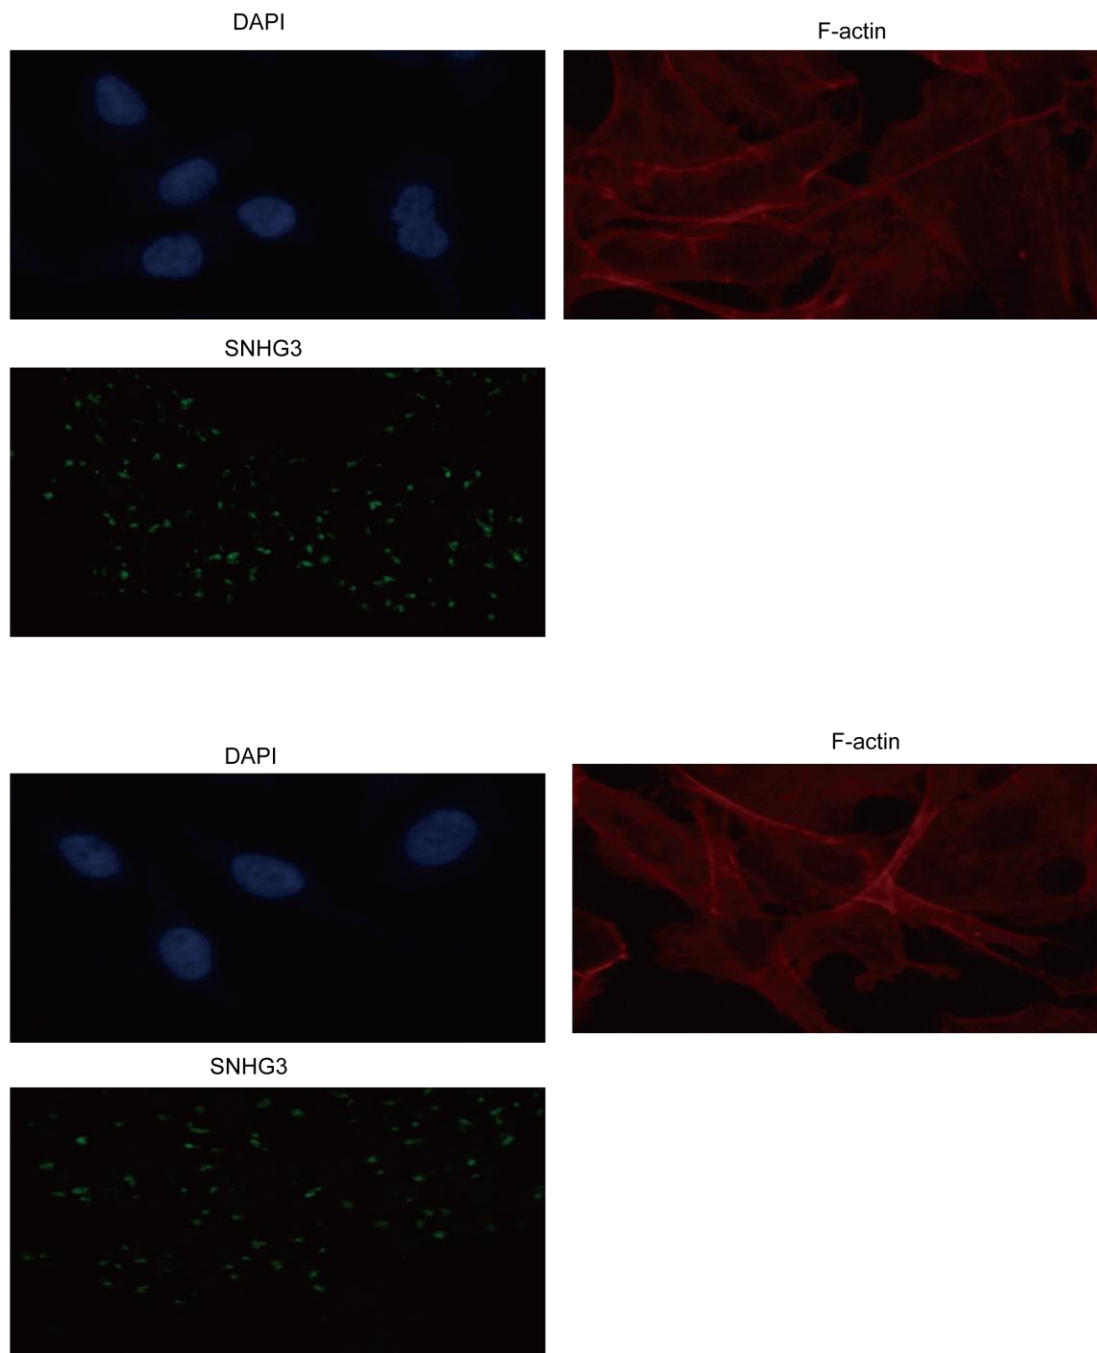

Fig2B

| Time (h) | NC si | NC si | NC si | SNHG3<br>si#1 | SNHG3<br>si#1 | SNHG3<br>si#1 | SNHG3<br>si#2 | SNHG3<br>si#2 | SNHG3<br>si#2 |
|----------|-------|-------|-------|---------------|---------------|---------------|---------------|---------------|---------------|
| 0        | 0.291 | 0.283 | 0.27  | 0.21          | 0.257         | 0.249         | 0.232         | 0.266         | 0.228         |
| 24       | 0.461 | 0.49  | 0.408 | 0.357         | 0.382         | 0.354         | 0.329         | 0.383         | 0.483         |
| 48       | 0.686 | 0.629 | 0.777 | 0.421         | 0.4           | 0.433         | 0.496         | 0.542         | 0.544         |
| 72       | 0.991 | 0.953 | 1.097 | 0.771         | 0.598         | 0.677         | 0.731         | 0.886         | 0.837         |
| 96       | 1.548 | 1.418 | 1.465 | 0.869         | 0.873         | 1.102         | 1.111         | 1.065         | 1.216         |

Fig2C

| Time (h) | NC si | NC si | NC si | SNHG3<br>si#1 | SNHG3<br>si#1 | SNHG3<br>si#1 | SNHG3<br>si#2 | SNHG3<br>si#2 | SNHG3<br>si#2 |
|----------|-------|-------|-------|---------------|---------------|---------------|---------------|---------------|---------------|
| 0        | 0.353 | 0.282 | 0.315 | 0.37          | 0.295         | 0.274         | 0.395         | 0.332         | 0.379         |
| 24       | 0.496 | 0.478 | 0.473 | 0.478         | 0.404         | 0.443         | 0.475         | 0.508         | 0.449         |
| 48       | 0.84  | 0.783 | 0.822 | 0.586         | 0.511         | 0.467         | 0.495         | 0.687         | 0.589         |
| 72       | 1.138 | 1.204 | 1.324 | 0.707         | 0.541         | 0.653         | 0.79          | 0.962         | 0.876         |
| 96       | 1.726 | 1.643 | 1.665 | 0.979         | 0.801         | 1.052         | 1.132         | 1.268         | 1.05          |

Fig2F

|           | NC si | NC si | NC si | SNHG3<br>si#1 | SNHG3<br>si#1 | SNHG3<br>si#1 | SNHG3<br>si#2 | SNHG3<br>si#2 | SNHG3<br>si#2 |
|-----------|-------|-------|-------|---------------|---------------|---------------|---------------|---------------|---------------|
| Migration | 100   | 102   | 107   | 59            | 60            | 44            | 71            | 62            | 74            |
| Invasion  | 100   | 105   | 106   | 48            | 51            | 57            | 72            | 69            | 63            |

Fig2G

|           | NC si | NC si | NC si | SNHG3<br>si#1 | SNHG3<br>si#1 | SNHG3<br>si#1 | SNHG3<br>si#2 | SNHG3<br>si#2 | SNHG3<br>si#2 |
|-----------|-------|-------|-------|---------------|---------------|---------------|---------------|---------------|---------------|
| Migration | 100   | 103   | 93    | 48            | 48            | 59            | 66            | 77            | 78            |
| Invasion  | 100   | 93    | 107   | 35            | 61            | 54            | 79            | 67            | 79            |

Fig5A

| Time (h) | miR-NC | miR-NC | miR-NC | miR-515-5p | miR-515-5p | miR-515-5p | miR-515-5p+ <p>pC</p> <p>MV-control</p> | miR-515-5p+ <p>pC</p> <p>MV-control</p> | miR-515-5p+ <p>pC</p> <p>MV-control</p> | miR-515-5p+ <p>NHG</p> <p>3-WT</p> | miR-515-5p+ <p>NHG</p> <p>3-WT</p> | miR-515-5p+ <p>NHG</p> <p>3-WT</p> | miR-515-5p+ <p>NHG</p> <p>3-MU</p> <p>T1-2</p> | miR-515-5p+ <p>NHG</p> <p>3-MU</p> <p>T1-2</p> | miR-515-5p+ <p>NHG</p> <p>3-MU</p> <p>T1-2</p> |
|----------|--------|--------|--------|------------|------------|------------|-----------------------------------------|-----------------------------------------|-----------------------------------------|------------------------------------|------------------------------------|------------------------------------|------------------------------------------------|------------------------------------------------|------------------------------------------------|
| 0        | 0.367  | 0.255  | 0.3    | 0.301      | 0.311      | 0.305      | 0.373                                   | 0.265                                   | 0.385                                   | 0.37                               | 0.331                              | 0.307                              | 0.389                                          | 0.354                                          | 0.29                                           |
| 24       | 0.577  | 0.477  | 0.59   | 0.523      | 0.523      | 0.488      | 0.549                                   | 0.508                                   | 0.544                                   | 0.588                              | 0.545                              | 0.513                              | 0.533                                          | 0.511                                          | 0.494                                          |
| 48       | 0.748  | 0.884  | 0.701  | 0.559      | 0.561      | 0.615      | 0.553                                   | 0.716                                   | 0.673                                   | 0.759                              | 0.693                              | 0.663                              | 0.618                                          | 0.596                                          | 0.49                                           |
| 72       | 1.019  | 1.145  | 1.144  | 0.707      | 0.791      | 0.649      | 0.758                                   | 0.644                                   | 0.776                                   | 0.945                              | 1                                  | 0.891                              | 0.695                                          | 0.745                                          | 0.641                                          |
| 96       | 1.686  | 1.731  | 1.617  | 0.983      | 0.831      | 0.88       | 0.985                                   | 1.02                                    | 0.892                                   | 1.492                              | 1.365                              | 1.295                              | 1.042                                          | 0.853                                          | 1.045                                          |

Fig5B

|           | miR-NC | miR-NC | miR-NC | miR-515-5p | miR-515-5p | miR-515-5p | miR-515-5p+ <p>pC</p> <p>MV-control</p> | miR-515-5p+ <p>pC</p> <p>MV-control</p> | miR-515-5p+ <p>pC</p> <p>MV-control</p> | miR-515-5p+ <p>NHG</p> <p>3-WT</p> | miR-515-5p+ <p>NHG</p> <p>3-WT</p> | miR-515-5p+ <p>NHG</p> <p>3-WT</p> | miR-515-5p+ <p>NHG</p> <p>3-MU</p> <p>T1-2</p> | miR-515-5p+ <p>NHG</p> <p>3-MU</p> <p>T1-2</p> | miR-515-5p+ <p>NHG</p> <p>3-MU</p> <p>T1-2</p> |
|-----------|--------|--------|--------|------------|------------|------------|-----------------------------------------|-----------------------------------------|-----------------------------------------|------------------------------------|------------------------------------|------------------------------------|------------------------------------------------|------------------------------------------------|------------------------------------------------|
| Migration | 100    | 105    | 106    | 39         | 54         | 60         | 48                                      | 52                                      | 57                                      | 90                                 | 81                                 | 75                                 | 40                                             | 62                                             | 60                                             |
| Invasion  | 100    | 106    | 100    | 35         | 38         | 48         | 32                                      | 54                                      | 52                                      | 66                                 | 81                                 | 68                                 | 33                                             | 39                                             | 56                                             |

Fig7A

| Time (h) | pCM V- contro 1 | pCM V- contro 1 | pCM V- contro 1 | SNH G3- WT+ miR-NC | SNH G3- WT+ miR-NC | SNH G3- WT+ miR-NC | SNH G3- WT+ miR-515-5p | SNH G3- WT+ miR-515-5p | SNH G3- WT+ miR-515-5p | SNHG 3- WT+S UMO2 si | SNHG 3- WT+S UMO2 si | SNHG 3- WT+S UMO2 si |
|----------|-----------------|-----------------|-----------------|--------------------|--------------------|--------------------|------------------------|------------------------|------------------------|----------------------|----------------------|----------------------|
| 0        | 0.275           | 0.293           | 0.225           | 0.236              | 0.299              | 0.259              | 0.296                  | 0.222                  | 0.202                  | 0.24                 | 0.241                | 0.226                |
| 24       | 0.415           | 0.468           | 0.404           | 0.438              | 0.424              | 0.442              | 0.443                  | 0.312                  | 0.441                  | 0.451                | 0.441                | 0.315                |
| 48       | 0.414           | 0.62            | 0.495           | 0.775              | 0.634              | 0.786              | 0.644                  | 0.582                  | 0.592                  | 0.524                | 0.619                | 0.411                |
| 72       | 0.755           | 0.742           | 0.828           | 1.281              | 1.057              | 0.957              | 0.879                  | 0.884                  | 0.871                  | 0.859                | 0.835                | 0.706                |
| 96       | 1.026           | 1.042           | 1.173           | 1.544              | 1.662              | 1.45               | 1.036                  | 1.143                  | 1.247                  | 1.156                | 1.152                | 1.149                |

Fig7B

| pCMV-control | SNHG3- WT+miR-NC | SNHG3- WT+miR-515-5p | SNHG3- WT+SUMO2 si |
|--------------|------------------|----------------------|--------------------|
| 100          | 153              | 106                  | 127                |
| 99           | 182              | 124                  | 130                |
| 102          | 176              | 129                  | 134                |
| 92           | 185              | 111                  | 128                |
