# Supplementary material for: LncRNA SNHG3 Promotes Proliferation and Metastasis of Non-Small-Cell Lung Cancer Cells Through miR-515-5p/SUMO2 Axis
Source: PubMed Central journal article supplement — Technol Cancer Res Treat. 2021 May 25;20:15330338211019376. doi: 10.1177/15330338211019376 (PMC8155750; doi:10.1177/15330338211019376), 2021-05-25
Supplement: sj-pdf-2-tct-10.1177_15330338211019376.pdf [file sj-pdf-2-tct-10.1177_15330338211019376.pdf]

**Table S1. Primer sequences used in qRT-PCR.**

| Gene name                | Primer sequence                                     | Ref Seq     |
|--------------------------|-----------------------------------------------------|-------------|
| SNHG3                    | F: caagatgagttagaccgattc<br>R: gcaagcaattctggcaat   | NR_036473   |
| GAPDH                    | F: ggtggtctcctctgactcaaca<br>R: gtggtcgttgaggcaatg  | NM_002046   |
| Universal Adaptor primer | gcgagcacagaattaatcgac                               |             |
| RNU6B                    | F: ctcgctcggcagcaca<br>R: gcgagcacagaattaatcgac     | NG_034215.1 |
| hsa-miR-515-5p           | F: agaattgcacgtatccatc<br>R: ggtccagtttttttttttacag | NR_030184.1 |
